# Supplementary material
Source: PubMed Central journal article supplement (PMC7855203)
Supplement: NIHMS1642247-supplement-1.pdf [file NIHMS1642247-supplement-1.pdf]

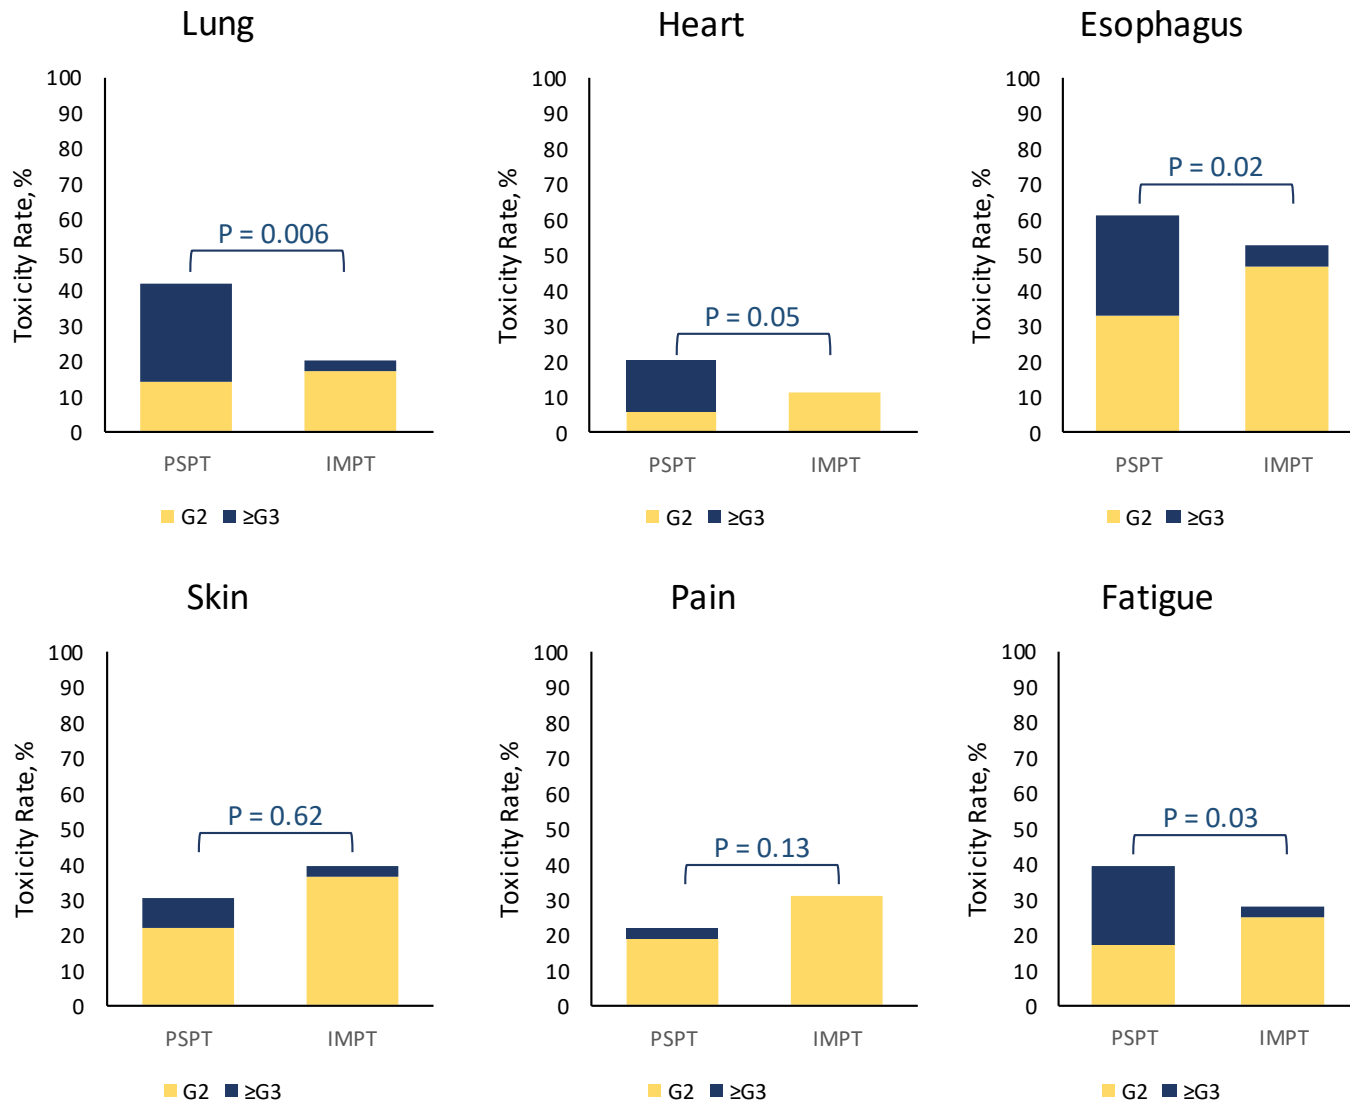

**Supplementary Figure e1.** Toxicity profiles of matched patients. Rates of grade 2 (yellow) and grade  $\geq 3$  (blue) toxicity to critical organs at risk for patients treated with passive scattering proton therapy (PSPT) or intensity-modulated proton therapy (IMPT). The P values above each set of bars correspond to differences in the rates of grade  $\geq 3$  toxicity only.  $P < 0.05$  was the threshold for statistical significance.

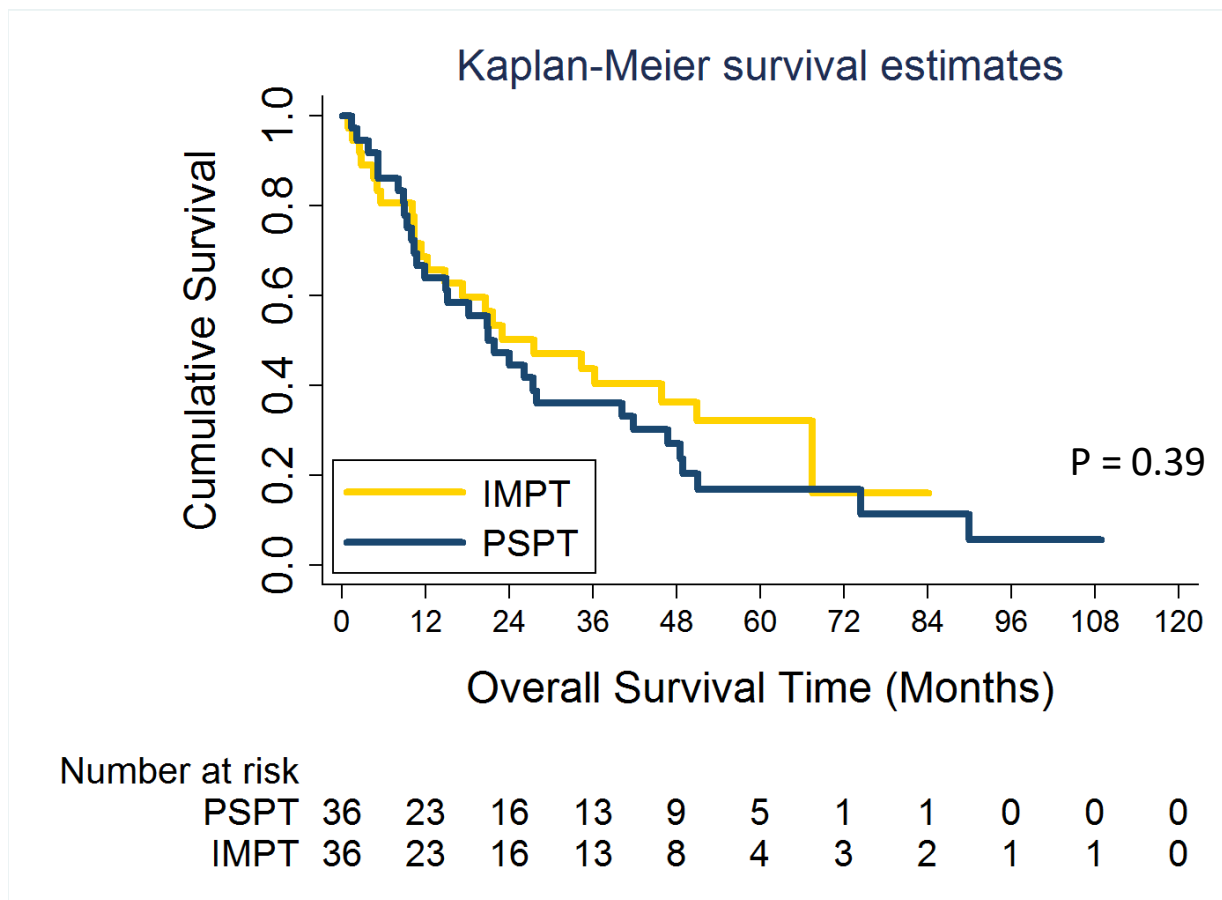

**Supplementary Figure e2. Overall survival of propensity score matched patients.**

| Structure                                  | Constraint                 |
|--------------------------------------------|----------------------------|
| Normal Lung (right lung + left lung - GTV) | $V_{20} \leq 37\%$         |
| Mean Lung Dose                             | $\leq 20\text{Gy(RBE)}$    |
|                                            |                            |
| Esophagus                                  | $V_{45} \leq 100\%$        |
|                                            | $V_{55} \leq 66\%$         |
|                                            | $V_{65} \leq 30\%$         |
|                                            | $V_{70} \leq 10\%$         |
|                                            | $V_{75} \leq 5\%$          |
|                                            | $V_{78} \leq 1.0\text{cc}$ |
|                                            |                            |
| Brachial Plexus                            | $V_{66} \leq 2.0\text{cc}$ |
|                                            | $V_{70} \leq 1.0\text{cc}$ |
|                                            | $V_{74} \leq 0.5\text{cc}$ |
|                                            | $V_{75} \leq 0.1\text{cc}$ |
|                                            |                            |
| Spinal Cord                                | $V_{50} < 2.0\text{cc}$    |
|                                            |                            |
| Heart Total                                | $V_{30} \leq 100\%$        |
|                                            | $V_{45} \leq 66\%$         |
|                                            | $V_{60} \leq 33\%$         |
| Atria (right + left)                       | $V_{30} < 50\%$            |
|                                            | $V_{40} < 40\%$            |
|                                            | $V_{45} < 30\%$            |
|                                            | $V_{50} < 20\%$            |
|                                            | $V_{60} < 15\%$            |
|                                            | $V_{70} < 8\%$             |
|                                            | $V_{74} < 4\%$             |
|                                            | $V_{78} < 1\%$             |
| Ventricles (right + left)                  | $V_{30} < 30\%$            |
|                                            | $V_{40} < 20\%$            |
|                                            | $V_{45} < 15\%$            |
|                                            | $V_{50} < 10\%$            |
|                                            | $V_{60} < 1\%$             |
|                                            | $V_{70} = 0\%$             |
|                                            |                            |
| Liver                                      | $V_{\leq 25} = 100\%$      |
|                                            | $V_{\leq 35} = 50\%$       |

$V_x$ , volume of tissue exposed to a dose at least x [in Gy(RBE)]

**Supplementary Table e1. Organs at risk dose constraints**

| Parameter                              | Matched patients (n = 72) |            |            |         |
|----------------------------------------|---------------------------|------------|------------|---------|
|                                        | All                       | PSPT       | IMPT       | P-value |
| <b>Sex, No. (%)</b>                    |                           |            |            | 0.81    |
| Female                                 | 34 (47)                   | 16 (44)    | 18 (50)    |         |
| Male                                   | 38 (53)                   | 20 (56)    | 18 (50)    |         |
| <b>Median age, y (range)</b>           | 68 (42-81)                | 70 (48-80) | 68 (49-81) | 0.84    |
| <b>Age group, No. (%)</b>              |                           |            |            | 0.48    |
| < 70                                   | 40 (56)                   | 18 (50)    | 22 (61)    |         |
| ≥ 70                                   | 32 (44)                   | 18 (50)    | 14 (39)    |         |
| <b>Smoking history, No. (%)</b>        |                           |            |            | 1.00    |
| Never                                  | 6 (8)                     | 3 (8)      | 3 (8)      |         |
| Ever                                   | 66 (92)                   | 33 (92)    | 33 (92)    |         |
| <b>Clinical disease stage, No. (%)</b> |                           |            |            | 0.88    |
| II                                     | 8 (11)                    | 4 (11)     | 4 (11)     |         |
| IIIA                                   | 26 (36)                   | 14 (39)    | 12 (33)    |         |
| IIIB                                   | 38 (53)                   | 18 (50)    | 20 (56)    |         |
| IV                                     | 0 (0)                     | 0 (0)      | 0 (0)      |         |
| Recurrence                             | 0 (0)                     | 0 (0)      | 0 (0)      |         |
| <b>Tumor Location, No. (%)</b>         |                           |            |            | 0.54    |
| RUL                                    | 21 (29)                   | 13 (36)    | 8 (22)     |         |
| RML                                    | 7 (10)                    | 2 (6)      | 5 (14)     |         |
| RLL                                    | 7 (10)                    | 4 (11)     | 3 (8)      |         |
| LUL                                    | 21 (29)                   | 9 (25)     | 12 (33)    |         |
| LLL                                    | 8 (11)                    | 5 (14)     | 3 (8)      |         |
| Mediastinum                            | 8 (11)                    | 3 (8)      | 5 (14)     |         |
| <b>Induction chemotherapy</b>          |                           |            |            | 1.00    |
| Yes                                    | 24 (33)                   | 12 (33)    | 12 (33)    |         |
| No                                     | 48 (67)                   | 24 (67)    | 24 (67)    |         |
| <b>Radiation dose, No. (%)</b>         |                           |            |            | 0.20    |
| < 66Gy                                 | 13 (18)                   | 9 (25)     | 4 (11)     |         |
| 66-68Gy                                | 19 (26)                   | 7 (19)     | 12 (33)    |         |
| 68-78Gy                                | 40 (56)                   | 20 (56)    | 20 (56)    |         |
| <b>Radiation dose, median (range)</b>  | 70 (54-78)                | 74 (54-75) | 70 (60-78) | 0.83    |

**Supplementary Table e2. Patient characteristics with matched analysis.** Left pane depict the patient characteristics for the overall population as shown in **Table 1**, while right panel depicts the baseline patient characteristics for a subset of patients whom were matched through propensity scoring for age, tumor stage, tumor location, type of systemic chemotherapy, adaptive plan, and total prescribed radiation dose. PSPT, passive scattering proton therapy; IMPT, intensity-modulated proton therapy.

| Organ at Risk | All patients (n = 139) |              |              |                    | Matched Patients (n = 72) |              |              |                    |
|---------------|------------------------|--------------|--------------|--------------------|---------------------------|--------------|--------------|--------------------|
|               | Toxicity Grade         | PSPT No. (%) | IMPT No. (%) | Cumulative No. (%) | Toxicity Grade            | PSPT No. (%) | IMPT No. (%) | Cumulative No. (%) |
| Lung          | G0                     | 55 (64)      | 36 (68)      | 91 (66)            | G0                        | 21 (58)      | 26 (72)      | 47 (65)            |
|               | G1                     | 4 (5)        | 9 (17)       | 13 (9)             | G1                        | 0 (0)        | 3 (8)        | 3 (4)              |
|               | G2                     | 12 (14)      | 7 (13)       | 19 (14)            | G2                        | 5 (14)       | 6 (17)       | 11 (15)            |
|               | G3                     | 15 (17)      | 1 (2)        | 16 (12)            | G3                        | 10 (28)      | 1 (3)        | 11 (15)            |
|               | G4                     | 0 (0)        | 0 (0)        | 0 (0)              | G4                        | 0 (0)        | 0 (0)        | 0 (0)              |
|               | G5                     | 0 (0)        | 0 (0)        | 0 (0)              | G5                        | 0 (0)        | 0 (0)        | 0 (0)              |
| RP + Fibrosis | G0                     | 59 (68)      | 52 (98)      | 111 (80)           | G0                        | 22 (61)      | 27 (75)      | 49 (68)            |
|               | G1                     | 6 (7)        | 0 (0)        | 6 (4)              | G1                        | 2 (6)        | 3 (8)        | 5 (7)              |
|               | G2                     | 12 (14)      | 0 (0)        | 12 (9)             | G2                        | 4 (11)       | 6 (17)       | 10 (14)            |
|               | G3                     | 9 (11)       | 1 (2)        | 10 (7)             | G3                        | 8 (22)       | 0 (0)        | 8 (11)             |
|               | G4                     | 0 (0)        | 0 (0)        | 0 (0)              | G4                        | 0 (0)        | 0 (0)        | 0 (0)              |
|               | G5                     | 0 (0)        | 0 (0)        | 0 (0)              | G5                        | 0 (0)        | 0 (0)        | 0 (0)              |
| Heart         | G0                     | 63 (73)      | 46 (87)      | 109 (78)           | G0                        | 24 (67)      | 30 (83)      | 54 (75)            |
|               | G1                     | 9 (11)       | 3 (6)        | 12 (9)             | G1                        | 5 (14)       | 2 (6)        | 7 (10)             |
|               | G2                     | 4 (5)        | 4 (7)        | 8 (6)              | G2                        | 2 (6)        | 4 (11)       | 6 (8)              |
|               | G3                     | 4 (5)        | 0 (0)        | 4 (3)              | G3                        | 2 (6)        | 0 (0)        | 2 (3)              |
|               | G4                     | 2 (2)        | 0 (0)        | 2 (2)              | G4                        | 0 (0)        | 0 (0)        | 0 (0)              |
|               | G5                     | 4 (5)        | 0 (0)        | 4 (3)              | G5                        | 3 (8)        | 0 (0)        | 3 (4)              |
| Esophagus     | G0                     | 28 (32)      | 6 (11)       | 34 (25)            | G0                        | 12 (33)      | 5 (14)       | 17 (24)            |
|               | G1                     | 9 (11)       | 19 (36)      | 28 (20)            | G1                        | 2 (6)        | 12 (33)      | 14 (19)            |
|               | G2                     | 35 (41)      | 24 (45)      | 59 (42)            | G2                        | 12 (33)      | 17 (47)      | 29 (40)            |
|               | G3                     | 14 (16)      | 4 (8)        | 18 (13)            | G3                        | 10 (28)      | 2 (6)        | 12 (17)            |
|               | G4                     | 0 (0)        | 0 (0)        | 0 (0)              | G4                        | 0 (0)        | 0 (0)        | 0 (0)              |
|               | G5                     | 0 (0)        | 0 (0)        | 0 (0)              | G5                        | 0 (0)        | 0 (0)        | 0 (0)              |
| Skin          | G0                     | 28 (33)      | 16 (30)      | 44 (31)            | G0                        | 12 (33)      | 11 (31)      | 23 (32)            |
|               | G1                     | 32 (37)      | 17 (32)      | 49 (35)            | G1                        | 13 (36)      | 11 (31)      | 24 (33)            |
|               | G2                     | 17 (20)      | 17 (32)      | 34 (25)            | G2                        | 8 (22)       | 13 (36)      | 21 (29)            |
|               | G3                     | (11)         | 3 (6)        | 12 (9)             | G3                        | 3 (8)        | 1 (3)        | 4 (6)              |
|               | G4                     | 0 (0)        | 0 (0)        | 0 (0)              | G4                        | 0 (0)        | 0 (0)        | 0 (0)              |
|               | G5                     | 0 (0)        | 0 (0)        | 0 (0)              | G5                        | 0 (0)        | 0 (0)        | 0 (0)              |
| Pain          | G0                     | 59 (69)      | 18 (34)      | 77 (55)            | G0                        | 21 (58)      | 13 (36)      | 34 (47)            |
|               | G1                     | 11 (13)      | 20 (38)      | 31 (22)            | G1                        | 7 (19)       | 12 (33)      | 19 (26)            |
|               | G2                     | 15 (17)      | 15 (28)      | 30 (22)            | G2                        | 7 (19)       | 11 (31)      | 18 (25)            |
|               | G3                     | 1 (1)        | 0 (0)        | 1 (1)              | G3                        | 1 (3)        | 0 (0)        | 1 (1)              |
|               | G4                     | 0 (0)        | 0 (0)        | 0 (0)              | G4                        | 0 (0)        | 0 (0)        | 0 (0)              |
|               | G5                     | 0 (0)        | 0 (0)        | 0 (0)              | G5                        | 0 (0)        | 0 (0)        | 0 (0)              |
| Fatigue       | G0                     | 26 (30)      | 4 (8)        | 30 (22)            | G0                        | 10 (28)      | 4 (11)       | 14 (19)            |
|               | G1                     | 27 (31)      | 33 (62)      | 60 (43)            | G1                        | 12 (33)      | 22 (61)      | 34 (47)            |
|               | G2                     | 22 (26)      | 15 (28)      | 37 (27)            | G2                        | 6 (17)       | 9 (25)       | 15 (21)            |
|               | G3                     | 11 (13)      | 1 (2)        | 12 (9)             | G3                        | 8 (22)       | 1 (3)        | 9 (13)             |
|               | G4                     | 0 (0)        | 0 (0)        | 0 (0)              | G4                        | 0 (0)        | 0 (0)        | 0 (0)              |
|               | G5                     | 0 (0)        | 0 (0)        | 0 (0)              | G5                        | 0 (0)        | 0 (0)        | 0 (0)              |

**Supplementary Table e3.** Details of Toxicity Severity and Rates between Treatment Groups. Left panel shows toxicity rate by site and toxicity grade for all patients included in this study before PSM, while the right panel depicts the rates after PSM. PSPT, passive scattering proton therapy; IMPT, intensity-modulated proton therapy.
